# Supplementary material for: The effect ofl-DOPA hydroxyl groups on the formation of supramolecular hydrogels
Source: Royal Society of Chemistry journal article supplement (doi:10.1039/c7ob01026e), 2017-01-01
Supplement: c7ob01026e1.pdf [file c7ob01026e1.pdf]

## Supporting Information

### Effect of the L-DOPA hydroxyl groups in the formation of supramolecular hydrogels

Nicola Zanna,<sup>\*a</sup> Debora Iaculli, and Claudia Tomasini<sup>\*a</sup>

<sup>a</sup>Dipartimento di Chimica "G. Ciamician" - Alma Mater Studiorum Università di Bologna  
Via F. Selmi 2, 40126 Bologna (Italy)

### Contents

|                                                                                                                                                                                                          |               |
|----------------------------------------------------------------------------------------------------------------------------------------------------------------------------------------------------------|---------------|
| <b>Table S1.</b> Physical properties of hydrogels obtained under selected conditions.                                                                                                                    | Page S2       |
| <b>Figure S1.</b> Photographs of hydrogels <b>10, 11, 13, 14, 17, 18, 19, 21, 30.</b>                                                                                                                    | Pages S3      |
| <b>Figure S2.</b> SEM images of samples of xerogel obtained by freeze drying samples of hydrogel <b>10, 11, 13, 14, 17, 18, 19, 21</b> and <b>30.</b> Bar = 20 micron.                                   | Pages S4      |
| <b>Figures S3-S5.</b> Strain dependence and frequency dependence of storage modulus and loss modulus for hydrogels <b>1-9.</b>                                                                           | Pages S5-S7   |
| <b>Figures S6-S11.</b> <sup>1</sup> H, <sup>13</sup> C, COSY NMR spectra and FT-IR spectra of Boc-L-DOPA[OBn] <sub>2</sub> -D-Oxd-OBn, Boc-L-DOPA[OBn] <sub>2</sub> -D-Oxd-OBn and Fmoc-L-DOPA-D-Oxd-OH. | Pages S8-S13  |
| <b>Figures S12-S29.</b> FT-IR spectrum of aerogel <b>1, 2, 3, 4, 5, 6, 7, 8, 9, 10, 11, 13, 14, 17, 18, 19, 21, 30.</b>                                                                                  | Pages S14-S22 |

**Table S1.** Physical properties of hydrogels obtained under selected conditions.

| Hydrogel | Gelator | Trigger (equiv.)                                       | Gelation time | Gel | Final pH | T <sub>gel</sub> (°C) | Gel properties |
|----------|---------|--------------------------------------------------------|---------------|-----|----------|-----------------------|----------------|
| 1        | A       | GdL (1.1)                                              | 16 h          | ✓   | 4.0      | 60 <sup>a</sup>       | -              |
| 2        | B       | GdL (1.1)                                              | 16 h          | ✓   | 4.5      | 66 <sup>a</sup>       | -              |
| 3        | C       | GdL (1.1)                                              | 16 h          | ✓   | 4.5      | 85 <sup>b</sup>       | thixotropic    |
| 4        | A       | CaCl <sub>2</sub> (0.3)                                | 30 min        | ✓   | 6.5      | 78 <sup>b</sup>       | -              |
| 5        | B       | CaCl <sub>2</sub> (0.3)                                | 30 min        | ✓   | 7.0      | 75 <sup>b</sup>       | -              |
| 6        | C       | CaCl <sub>2</sub> (0.3)                                | 30 min        | ✓   | 7.0      | 57 <sup>b</sup>       | thixotropic    |
| 7        | A       | ZnCl <sub>2</sub> (0.3)                                | 30 min        | ✓   | 7.0      | 89 <sup>b</sup>       | -              |
| 8        | B       | ZnCl <sub>2</sub> (0.3)                                | 5 h           | ✓   | 7.0      | 90 <sup>b</sup>       | thixotropic    |
| 9        | C       | ZnCl <sub>2</sub> (0.3)                                | 30 min        | ✓   | 7.0      | 98 <sup>c</sup>       | thixotropic    |
| 10       | A       | BaCl <sub>2</sub> (0.3)                                | 3 h           | ✓   | 7.0      | 65 <sup>b</sup>       | thixotropic    |
| 11       | B       | BaCl <sub>2</sub> (0.3)                                | 3 h           | ✓   | 7.0      | 73 <sup>b</sup>       | thixotropic    |
| 12       | C       | BaCl <sub>2</sub> (0.3)                                | -             | ✗   | -        | -                     | -              |
| 13       | A       | histidine (1)                                          | 1 h           | ✓   | 6.5      | 76 <sup>a</sup>       | thixotropic    |
| 14       | B       | histidine (1)                                          | 1 h           | ✓   | 6.5      | 70 <sup>b</sup>       | -              |
| 15       | C       | histidine (1)                                          | -             | ✗   | -        | -                     | -              |
| 16       | A       | MgCl <sub>2</sub> (0.3)                                | -             | ✗   | -        | -                     | -              |
| 17       | B       | MgCl <sub>2</sub> (0.3)                                | 3 h           | ✓   | 7.0      | 62 <sup>a</sup>       | thixotropic    |
| 18       | C       | MgCl <sub>2</sub> (0.3)                                | 3 h           | ✓   | 7.5      | 52 <sup>c</sup>       | thixotropic    |
| 19       | A       | CuCl <sub>2</sub> (0.3)                                | 3 h           | ✓   | 7.5      | 40 <sup>b</sup>       | -              |
| 20       | B       | CuCl <sub>2</sub> (0.3)                                | -             | ✗   | -        | -                     | -              |
| 21       | C       | CuCl <sub>2</sub> (0.3)                                | 16 h          | ✓   | 7.0      | 89 <sup>c</sup>       | -              |
| 22       | A       | Al <sub>2</sub> (SO <sub>4</sub> ) <sub>3</sub> (0.15) | -             | ✗   | -        | -                     | -              |
| 23       | B       | Al <sub>2</sub> (SO <sub>4</sub> ) <sub>3</sub> (0.15) | -             | ✗   | -        | -                     | -              |
| 24       | C       | Al <sub>2</sub> (SO <sub>4</sub> ) <sub>3</sub> (0.15) | 30 min        | ✗   | -        | -                     | -              |
| 25       | A       | Fe(NO <sub>3</sub> ) <sub>3</sub> (0.3)                | -             | ✗   | -        | -                     | -              |
| 26       | B       | Fe(NO <sub>3</sub> ) <sub>3</sub> (0.3)                | -             | ✗   | -        | -                     | -              |
| 27       | C       | Fe(NO <sub>3</sub> ) <sub>3</sub> (0.3)                | 16 h          | ✗   | -        | -                     | -              |
| 28       | A       | arginine (1)                                           | -             | ✗   | -        | -                     | -              |
| 29       | B       | arginine (1)                                           | -             | ✗   | -        | -                     | -              |
| 30       | C       | arginine (1)                                           | 1 h           | ✓   | 7.5      | 64 <sup>a</sup>       | -              |

<sup>a</sup>Thermoreversible. <sup>b</sup>Not thermoreversible gel, syneresis occurs after heating. <sup>c</sup>Not thermoreversible gel, the gelator melts then precipitate on cooling.

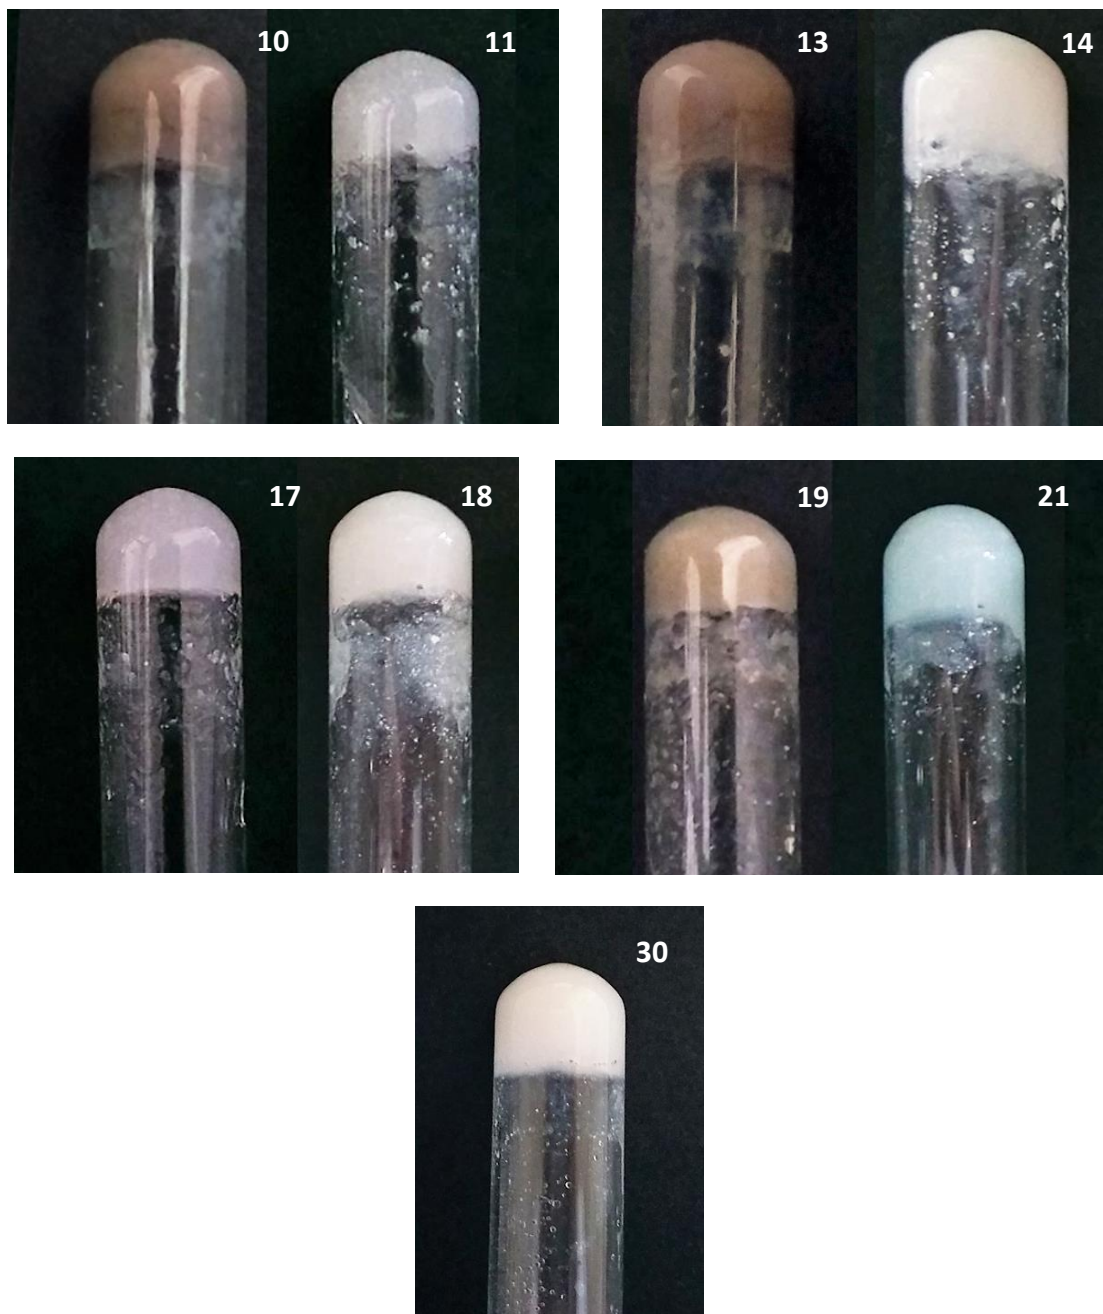

**Figure S1.** Photographs of hydrogels 10, 11, 13, 14, 17, 18, 19, 21, 30.

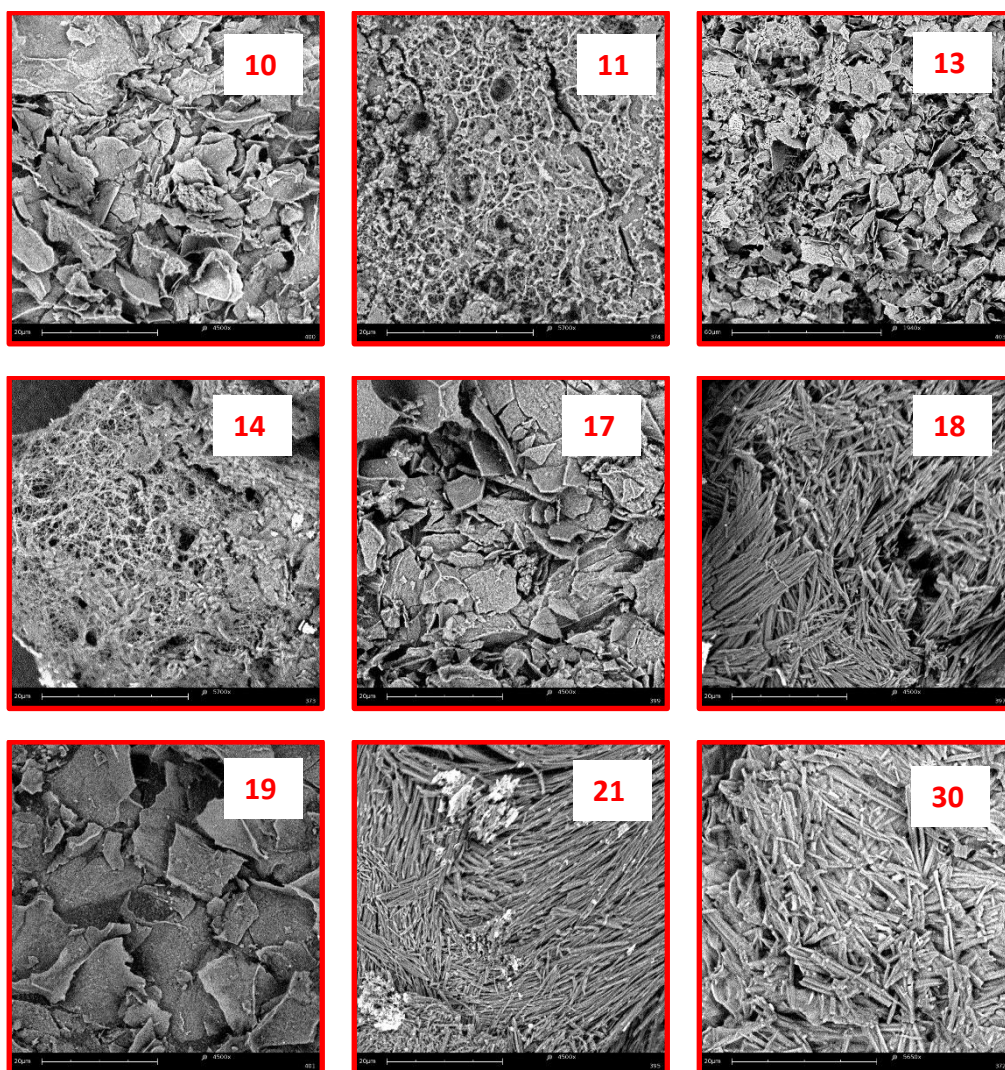

**Figure S2.** SEM images of samples of xerogel obtained by freeze drying samples of hydrogel **10, 11, 13, 14, 17, 18, 19, 21** and **30**. Bar = 20  $\mu\text{m}$ .

### Hydrogel 1

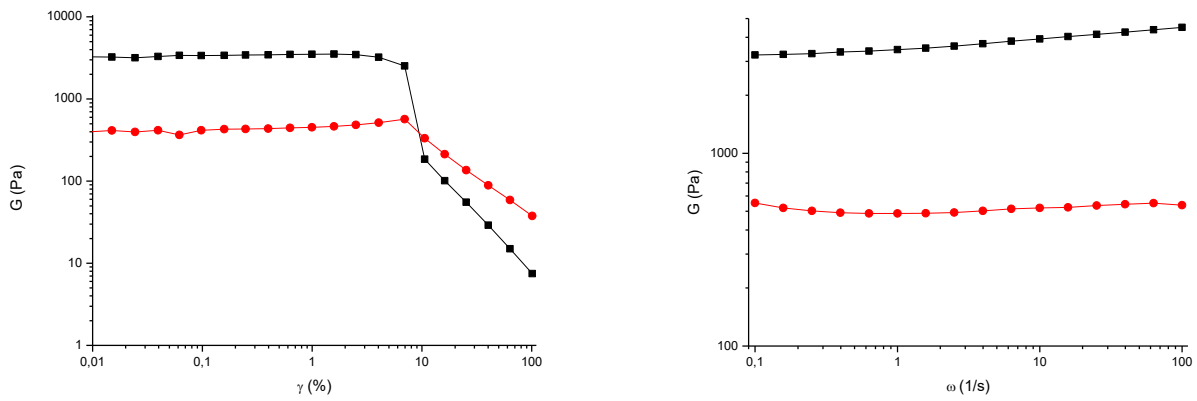

### Hydrogel 2

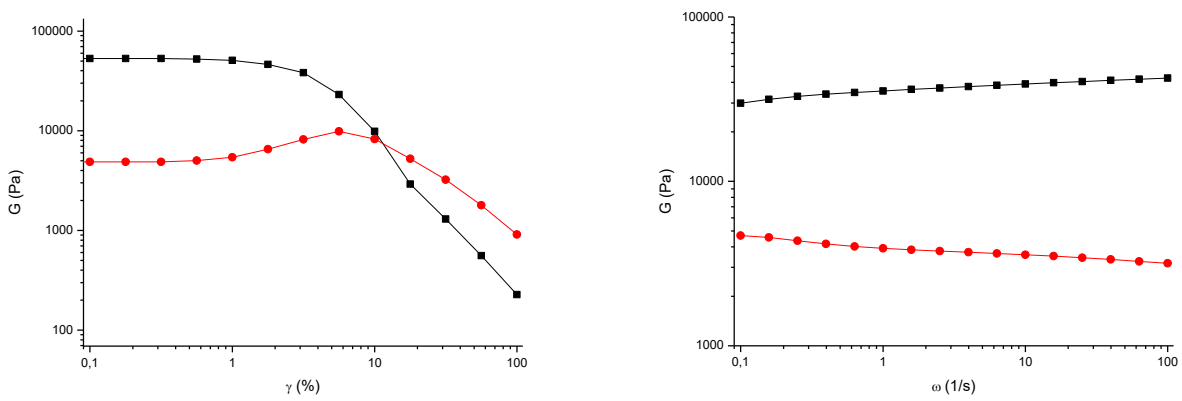

### Hydrogel 3

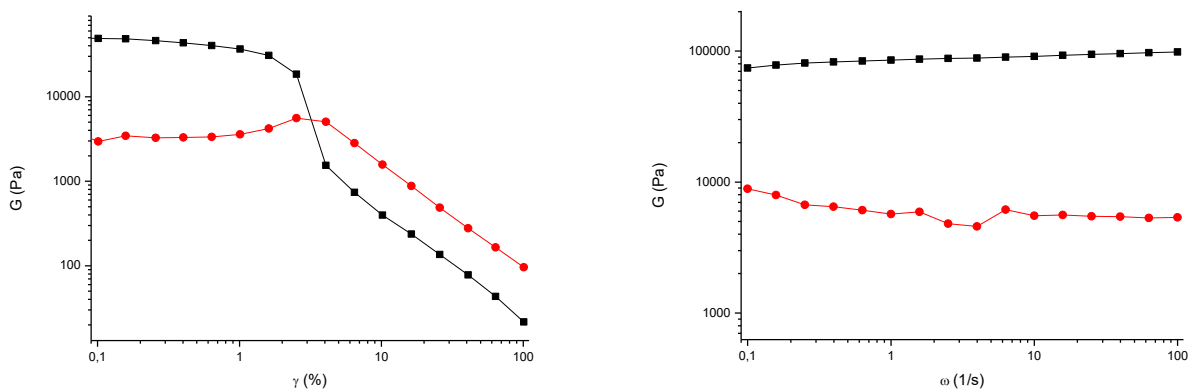

**Figure S3.** Strain dependence (left) and frequency dependence (right) of storage modulus (square) and loss modulus (triangle) for hydrogels 1, 2 and 3. The analyses were performed on the hydrogel about 20 hours after the gelation began.

### Hydrogel 4

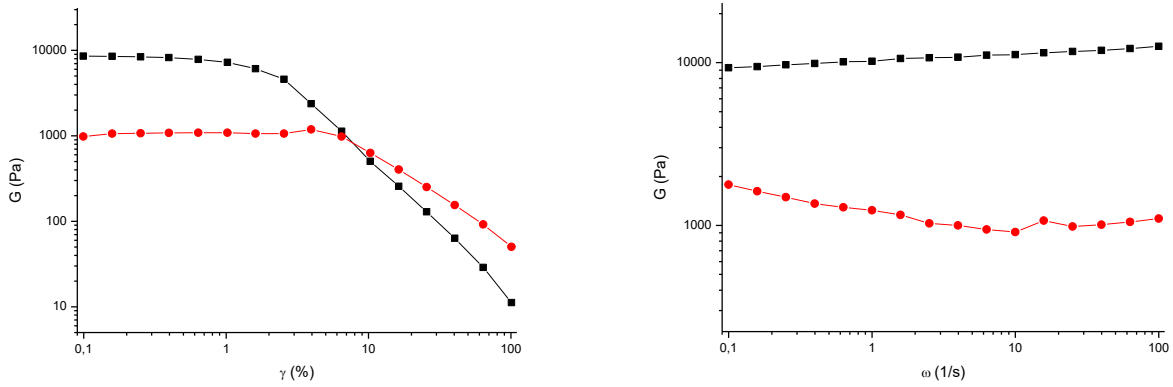

### Hydrogel 5

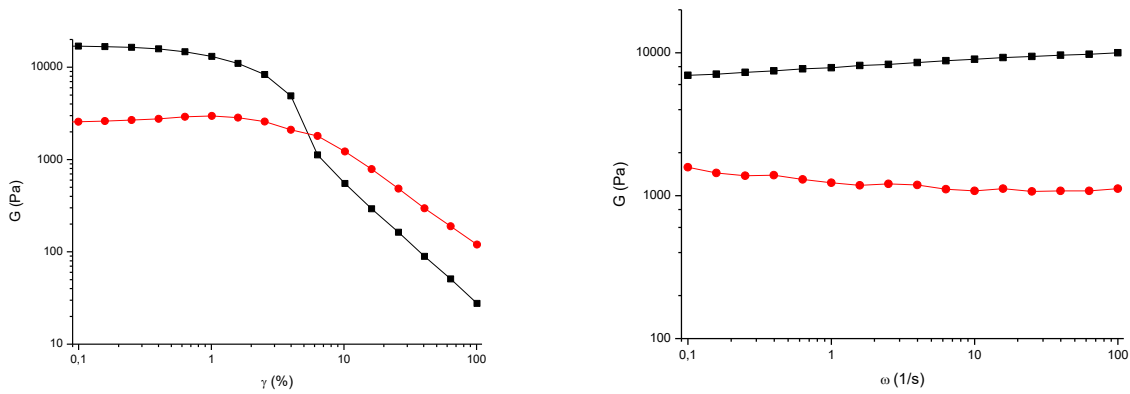

### Hydrogel 6

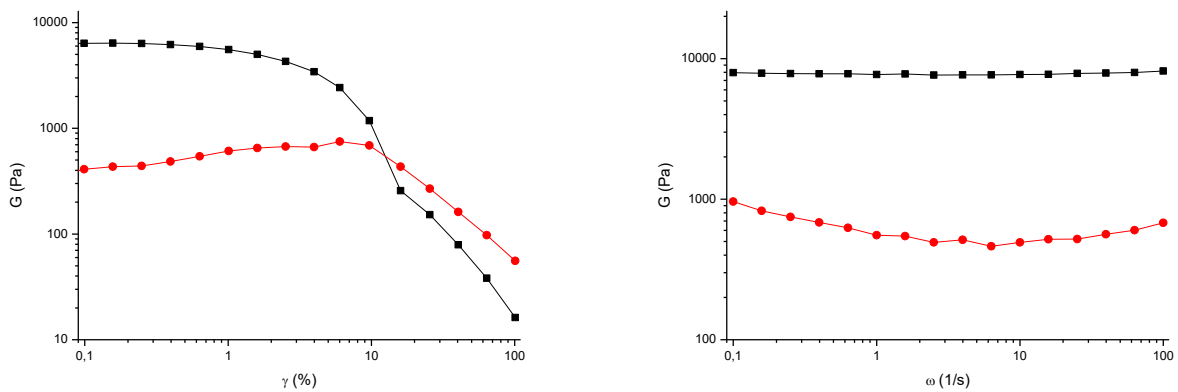

**Figure S4.** Strain dependence (left) and frequency dependence (right) of storage modulus (square) and loss modulus (triangle) for hydrogels 4, 5 and 6. The analyses were performed on the hydrogel about 20 hours after the gelation begun.

### Hydrogel 7

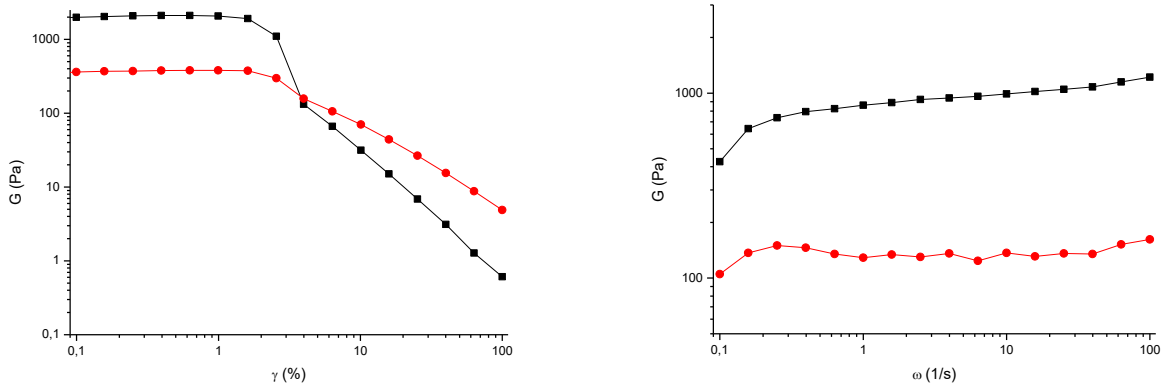

### Hydrogel 8

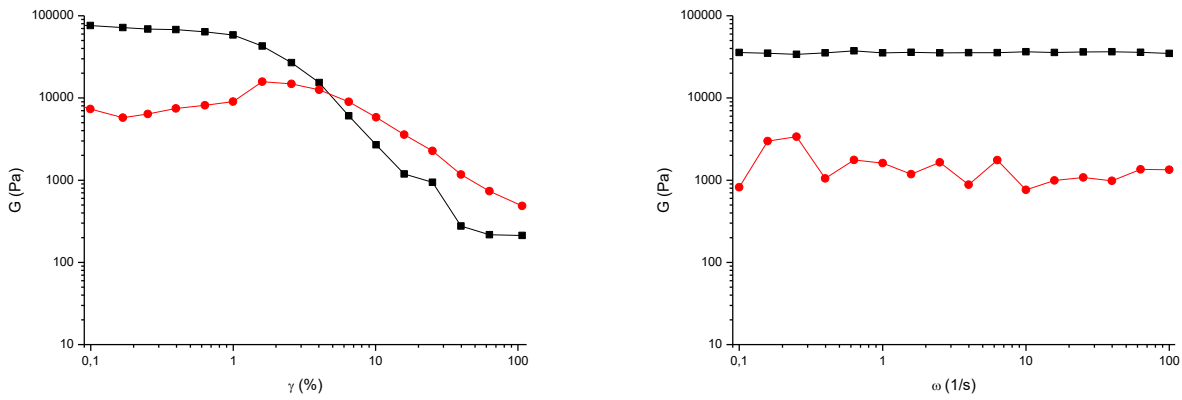

### Hydrogel 9

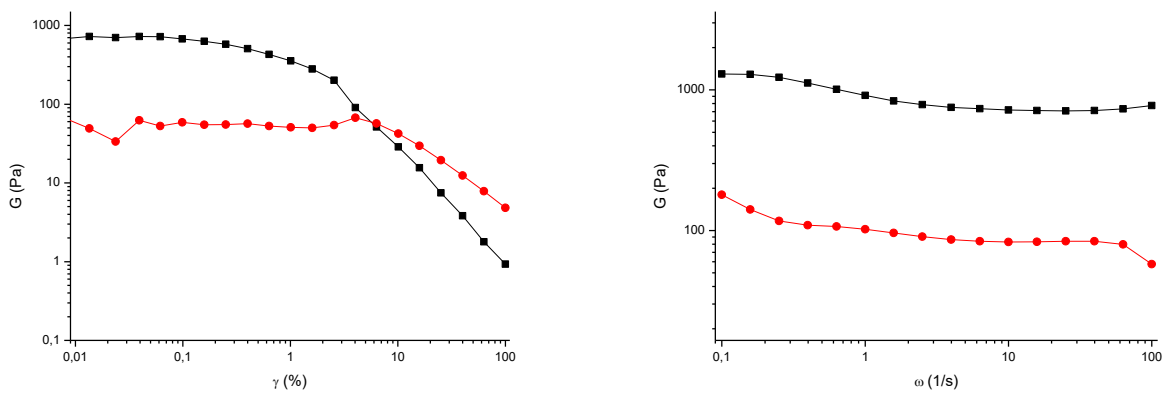

**Figure S5.** Strain dependence (left) and frequency dependence (right) of storage modulus (square) and loss modulus (triangle) for hydrogels 7, 8 and 9. The analyses were performed on the hydrogel about 20 hours after the gelation began.

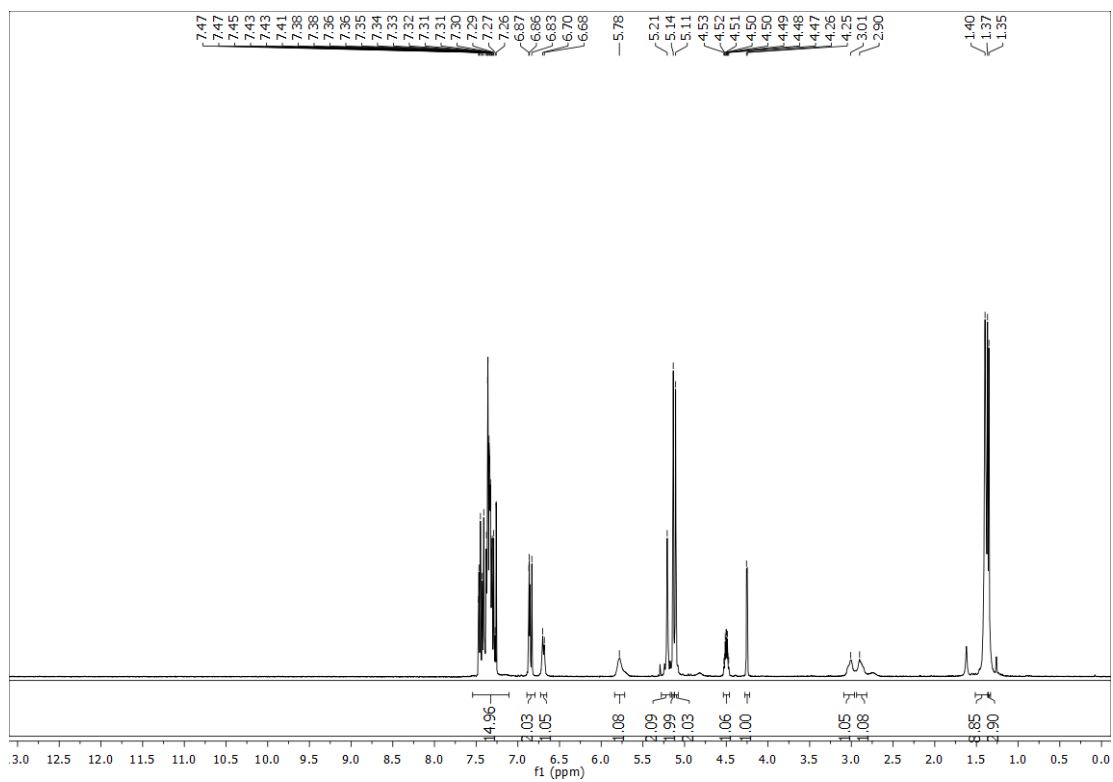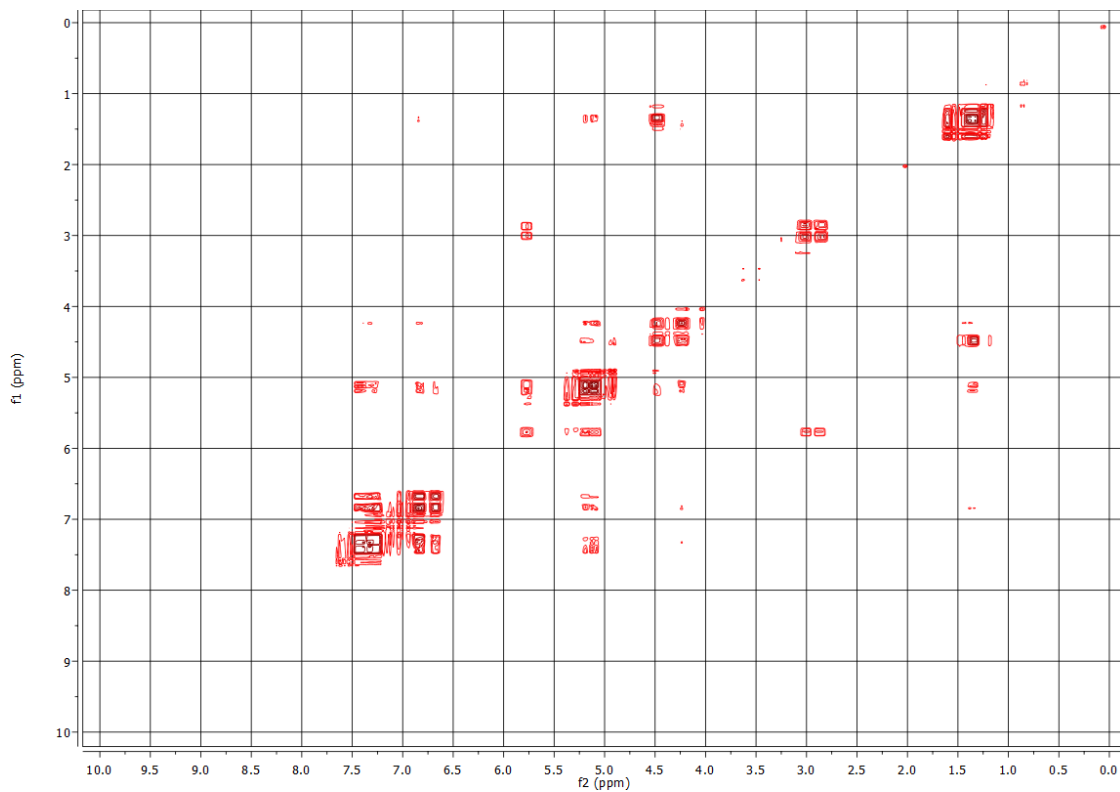

**Figure S6.**  $^1\text{H}$  NMR and COSY spectra of Boc-L-DOPA[OBn] $_2$ -D-Oxd-OBn.



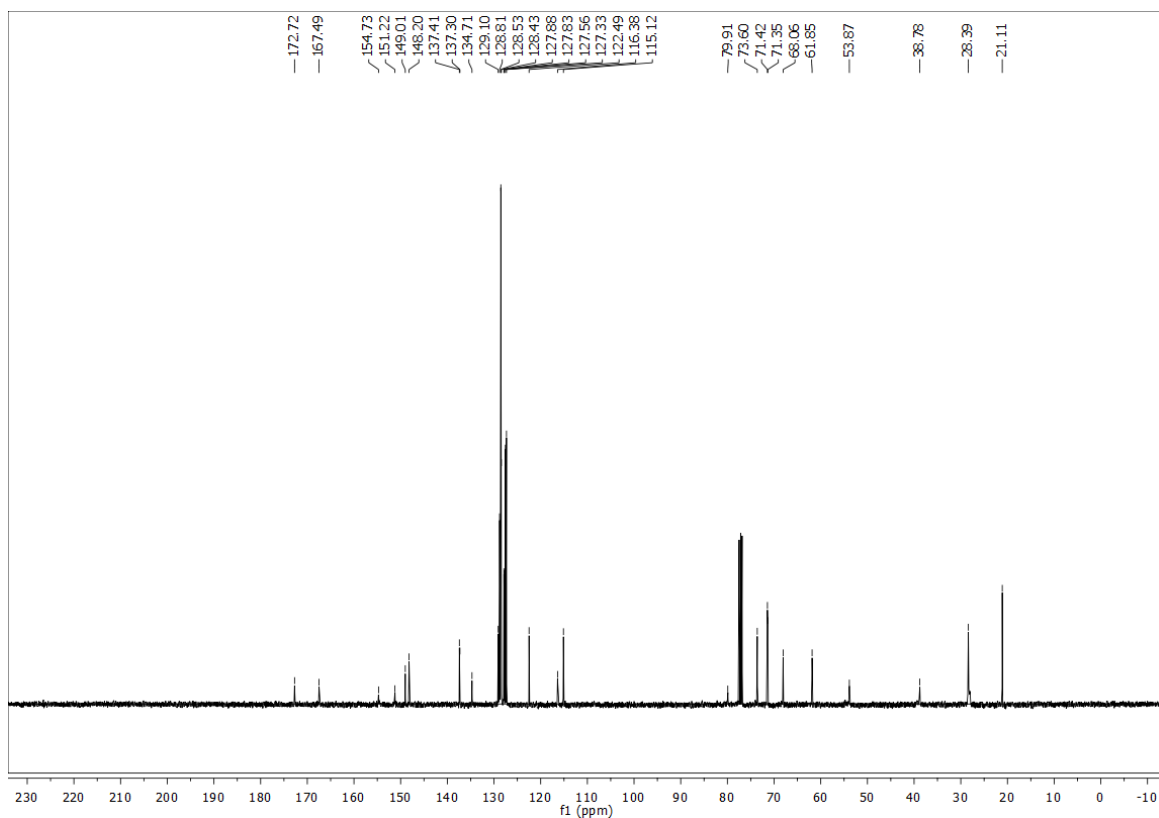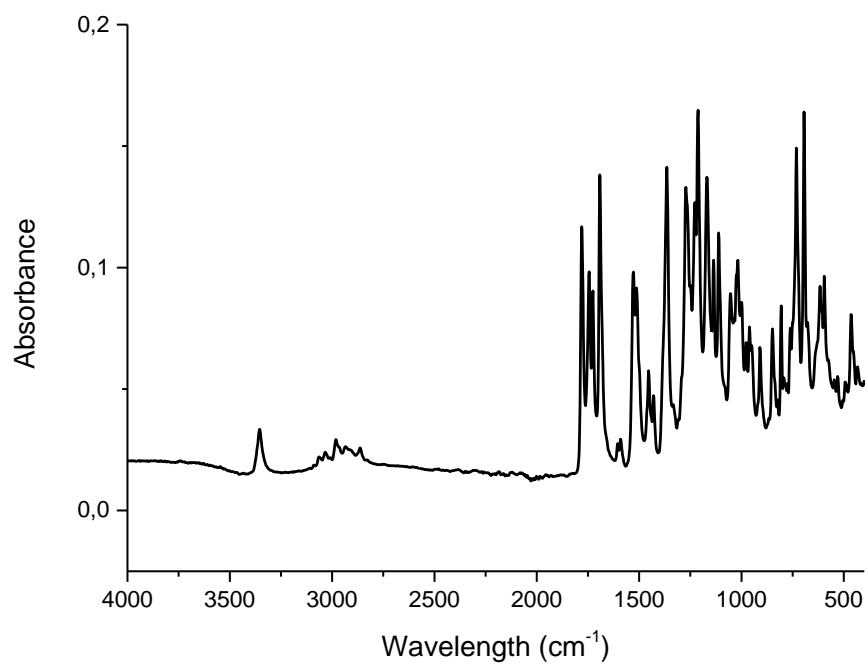

**Figure S7.**  $^{13}\text{C}$  NMR (top) and FT-IR (bottom) spectra of Boc-L-DOPA[OBn]<sub>2</sub>-D-Oxd-OBn.

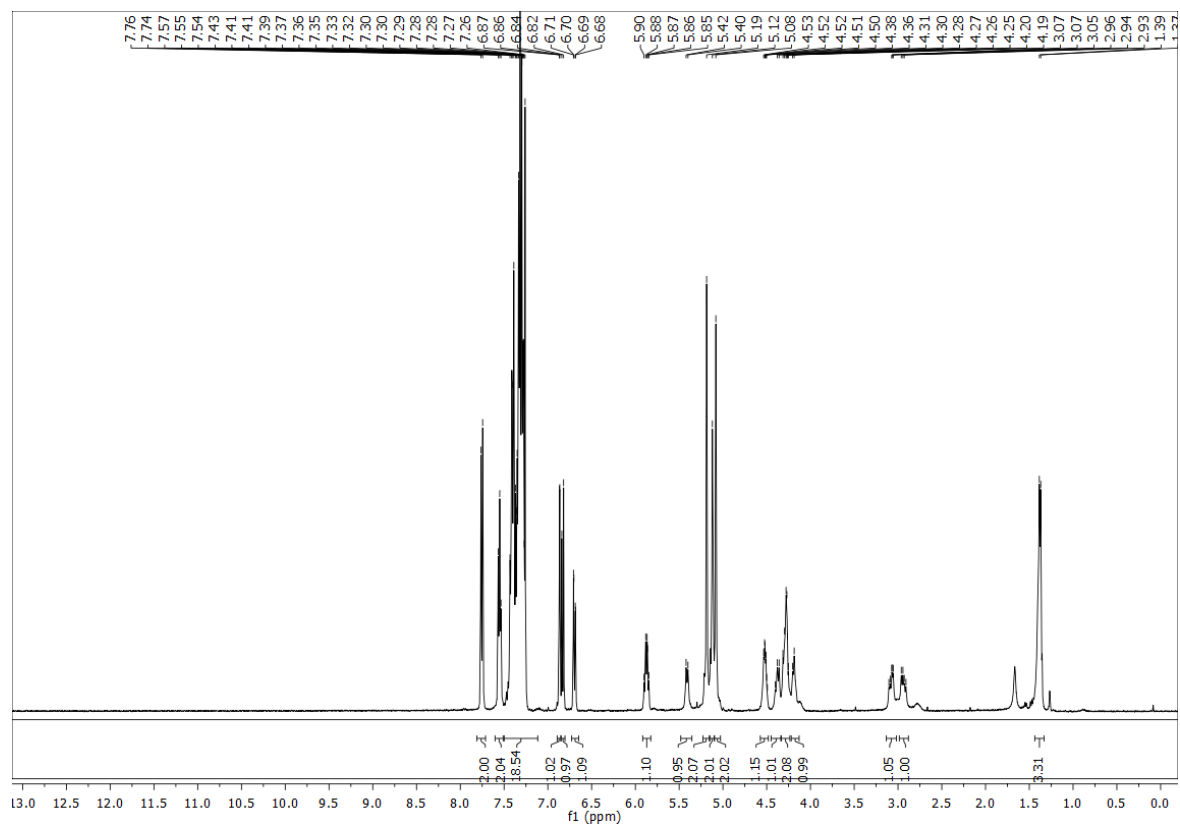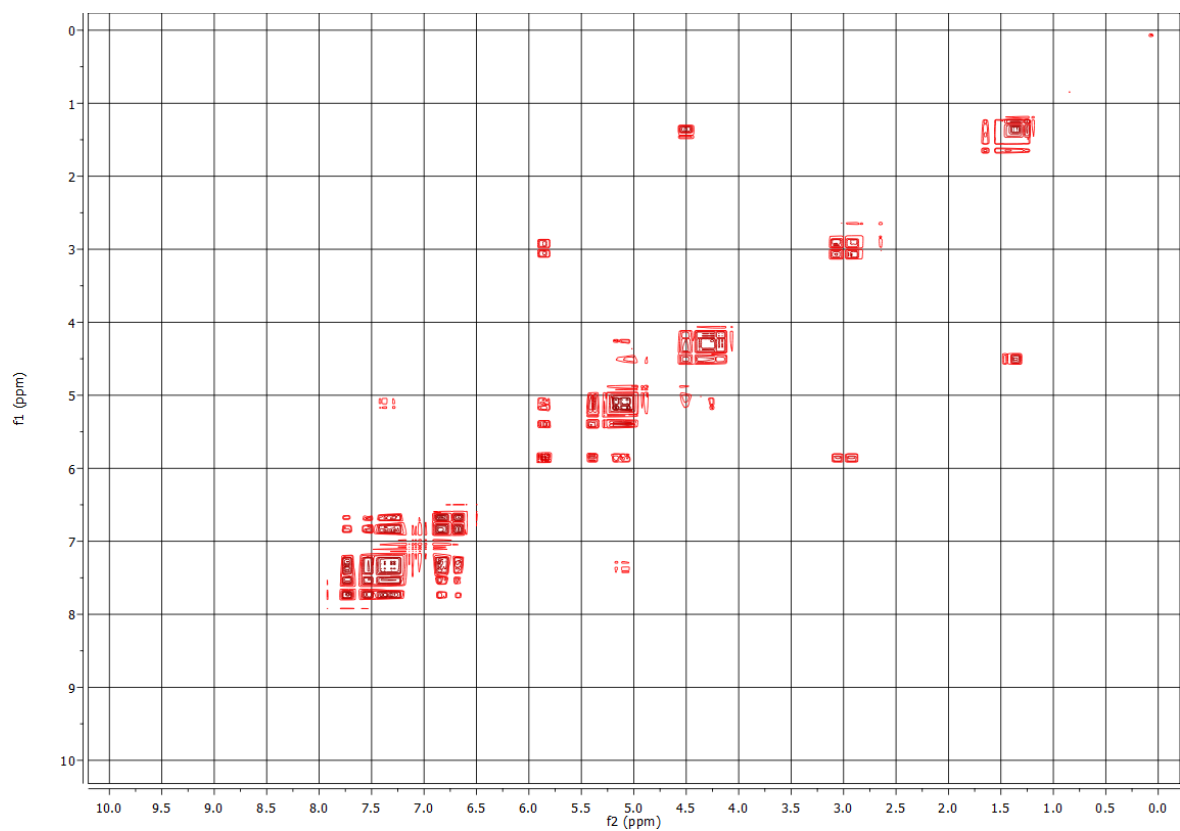

**Figure S8.**  $^1\text{H}$  NMR and COSY spectra of Fmoc-L-DOPA[OBn] $_2$ -D-Oxd-OBn.

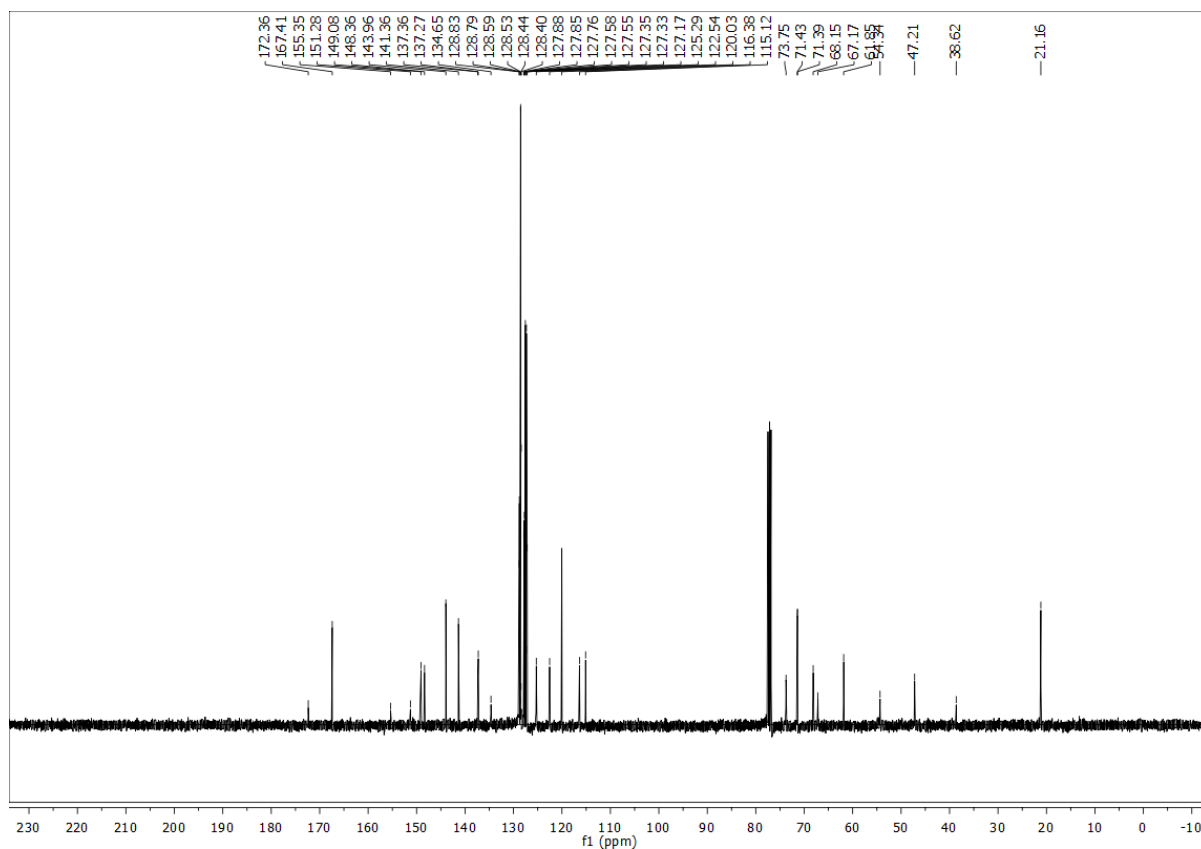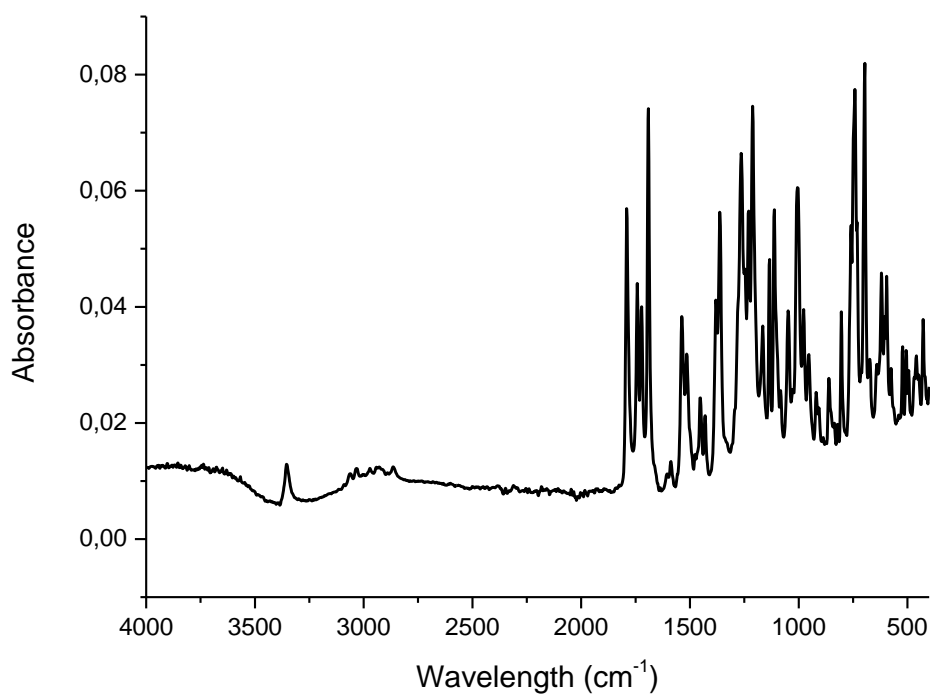

**Figure S9.** <sup>13</sup>C NMR (top) and FT-IR (bottom) spectra of Fmoc-L-DOPA[OBn]<sub>2</sub>-D-Oxd-OBn.

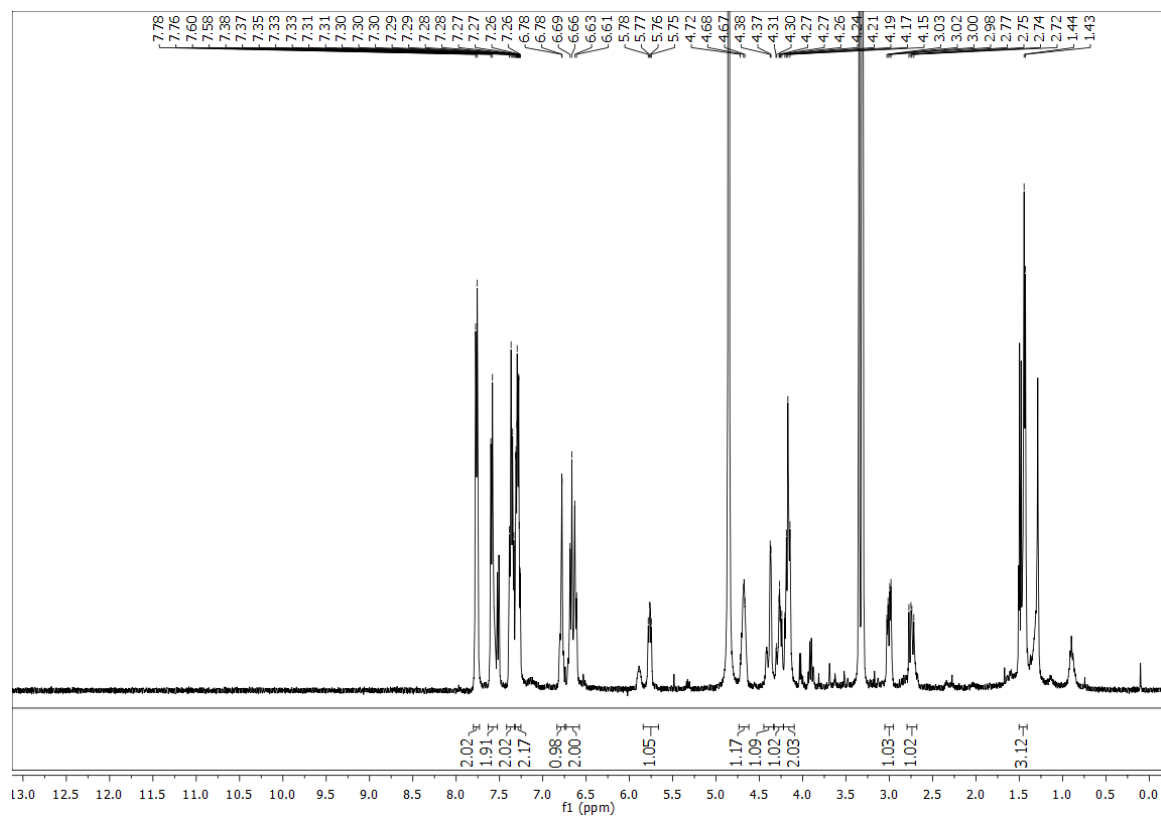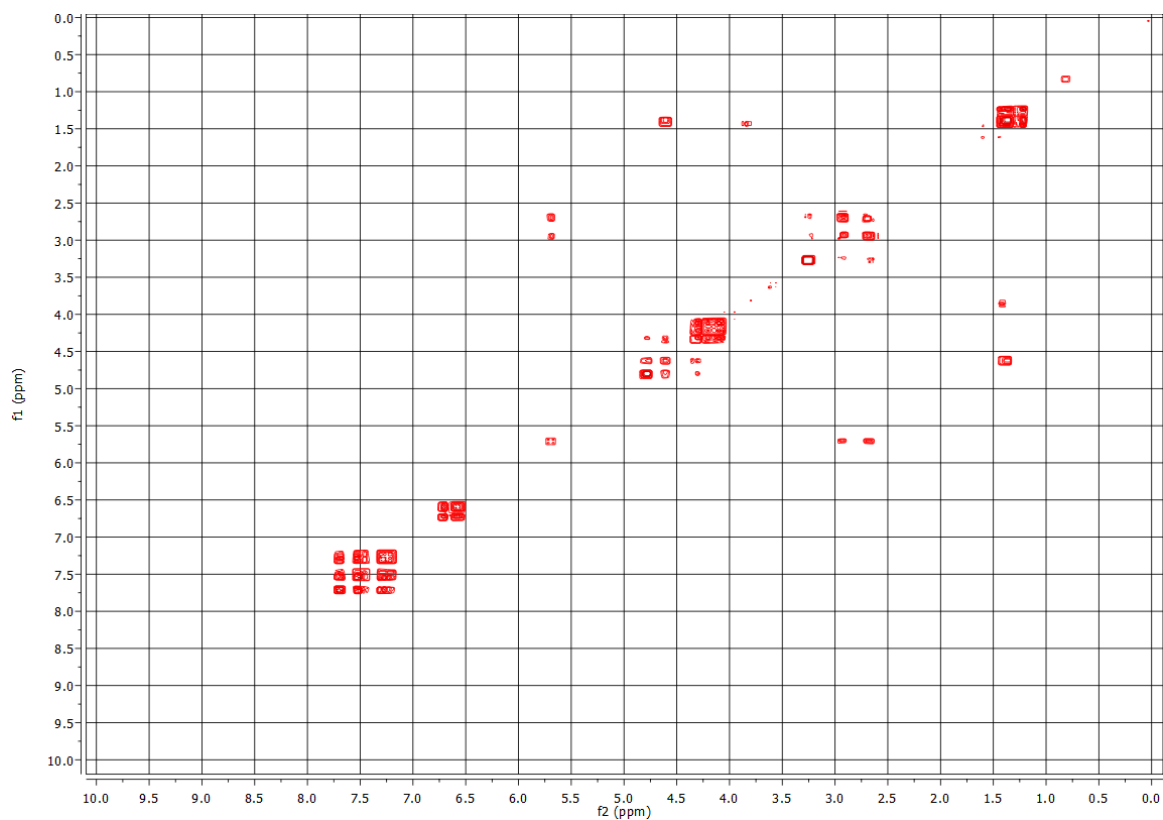

**Figure S10.**  $^1\text{H}$  NMR and COSY spectra of Fmoc-L-DOPA-D-Oxd-OH.

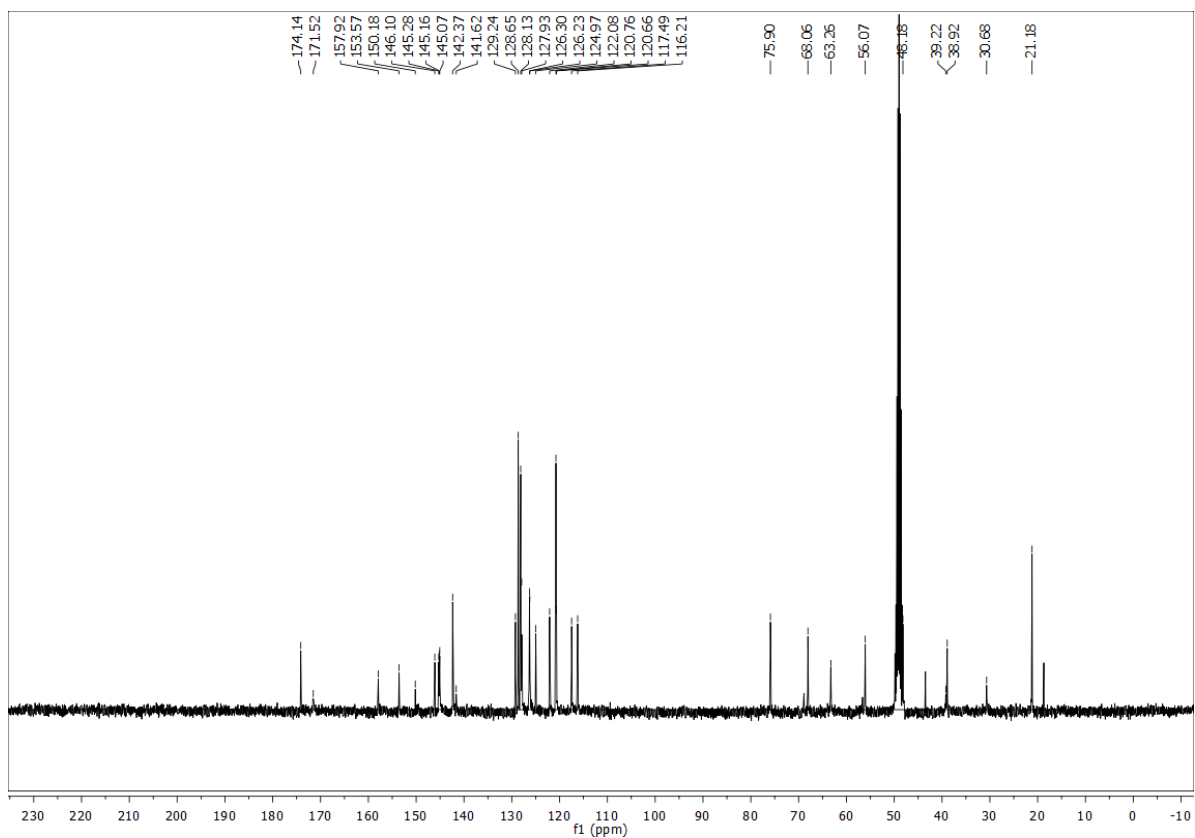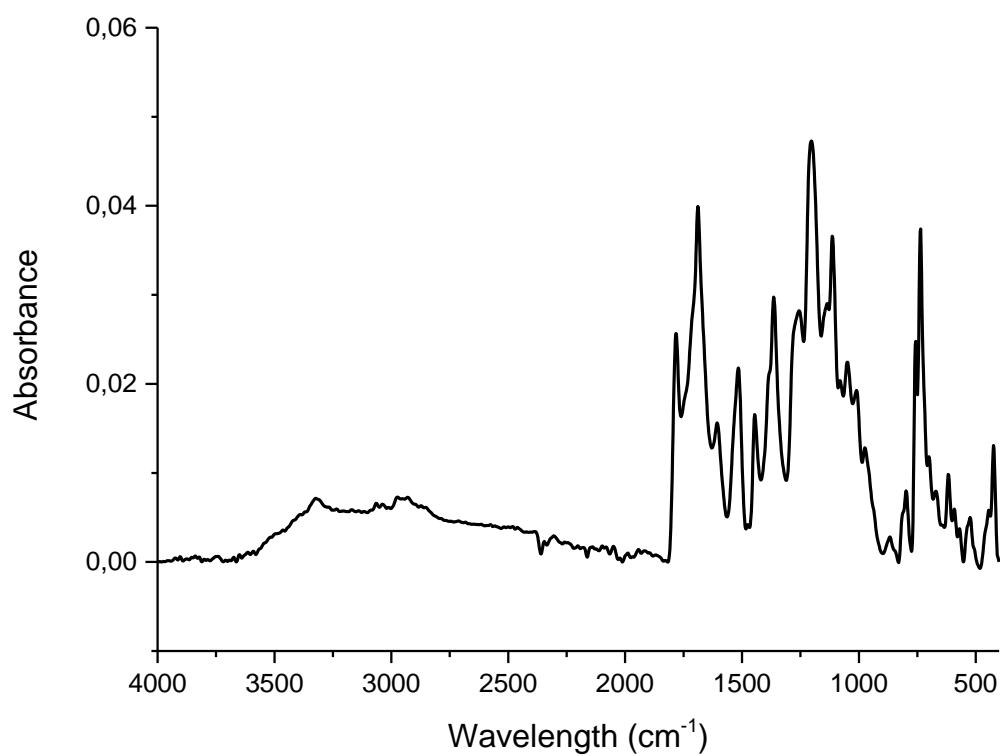

**Figure S11.**  $^{13}\text{C}$  NMR (top) and FT-IR (bottom) spectra of Fmoc-L-DOPA-D-Oxd-OH.

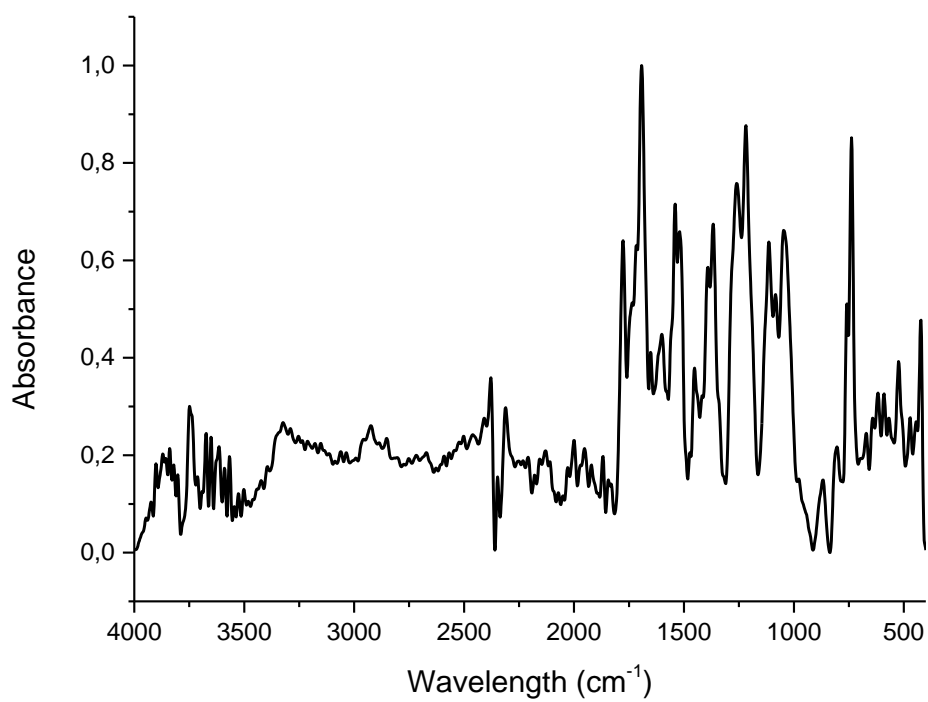

**Figure S12.** FT-IR spectrum of aerogel 1.

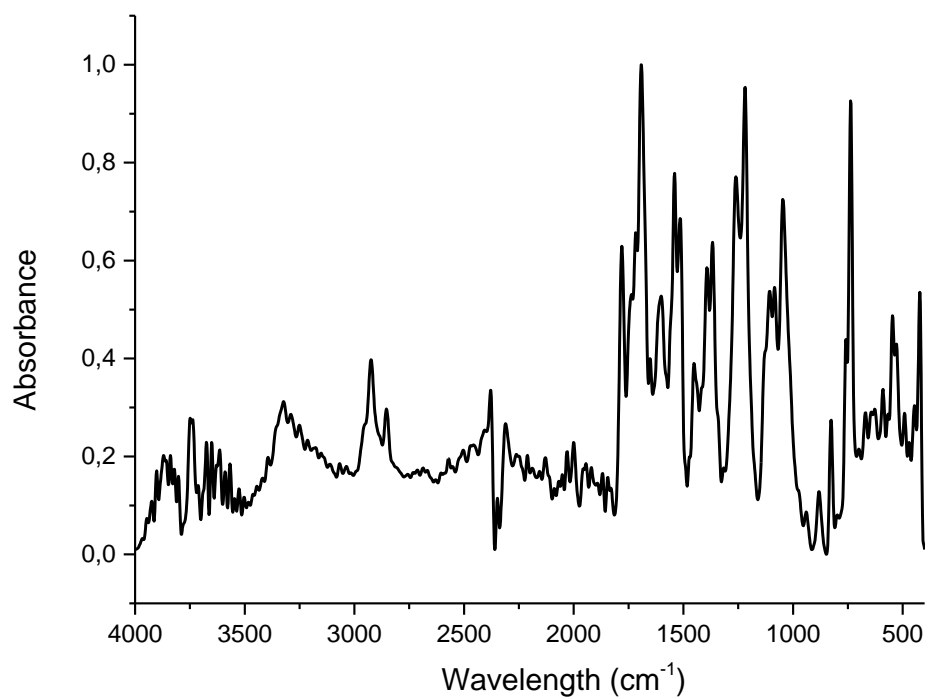

**Figure S13.** FT-IR spectrum of aerogel 2.

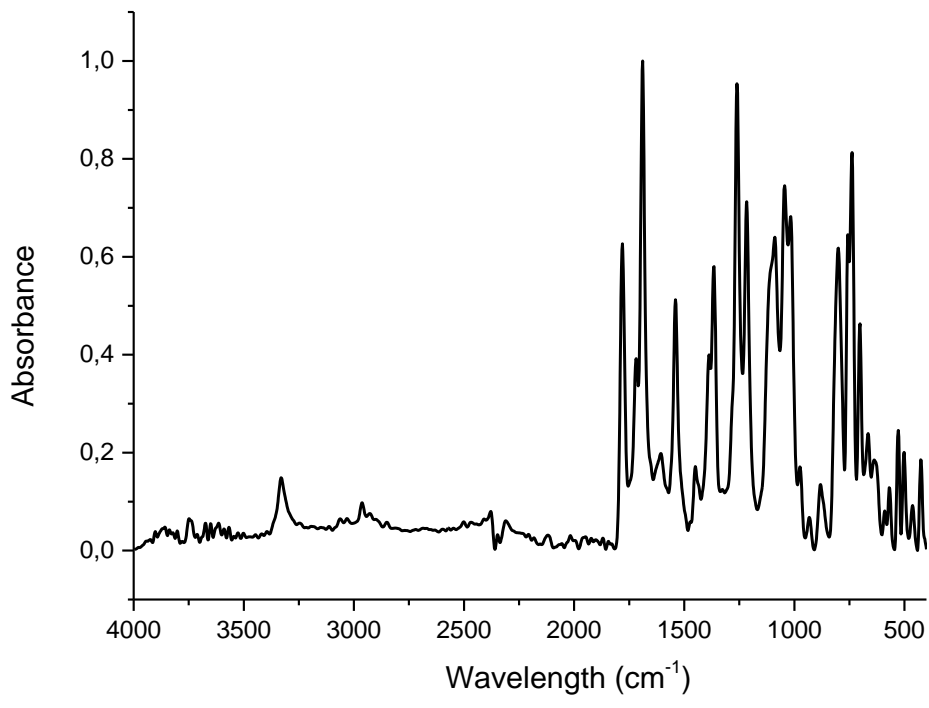

**Figure S14.** FT-IR spectrum of aerogel 3.

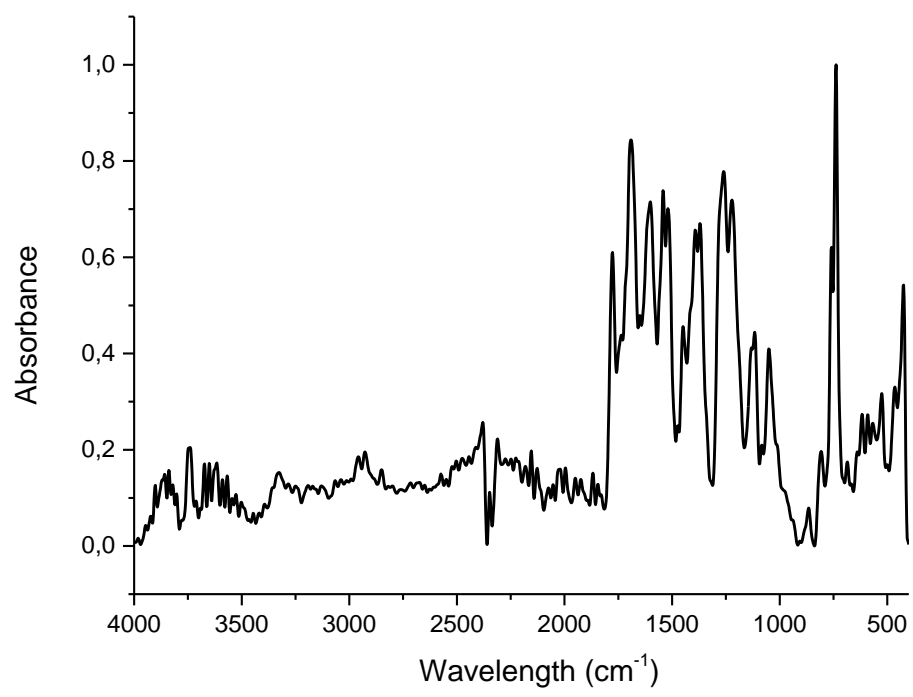

**Figure S15.** FT-IR spectrum of aerogel 4.

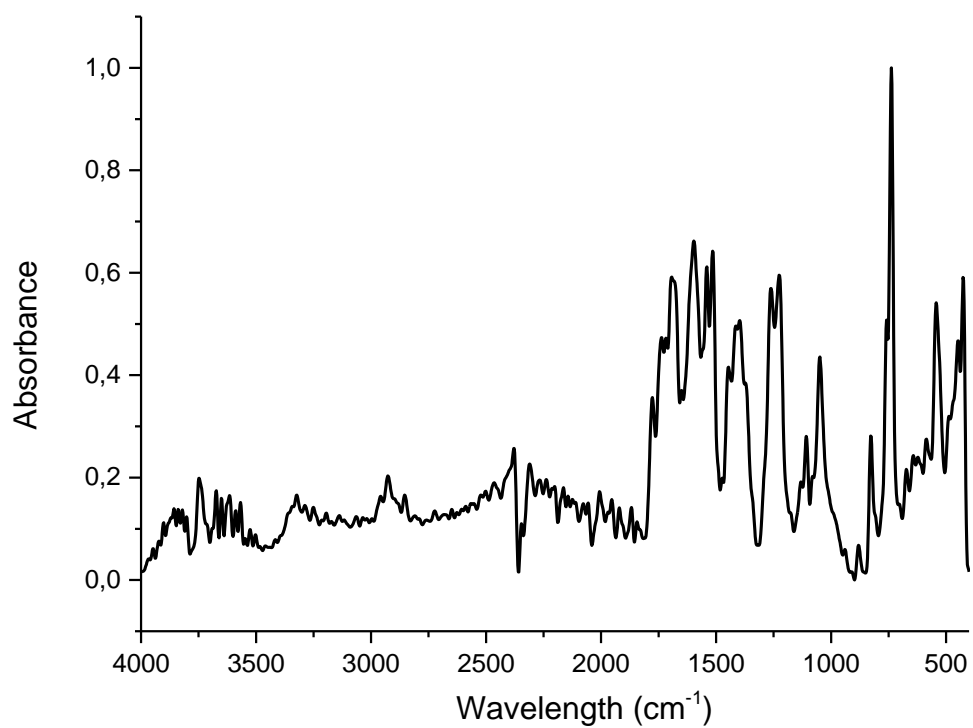

**Figure S16.** FT-IR spectrum of aerogel 5.

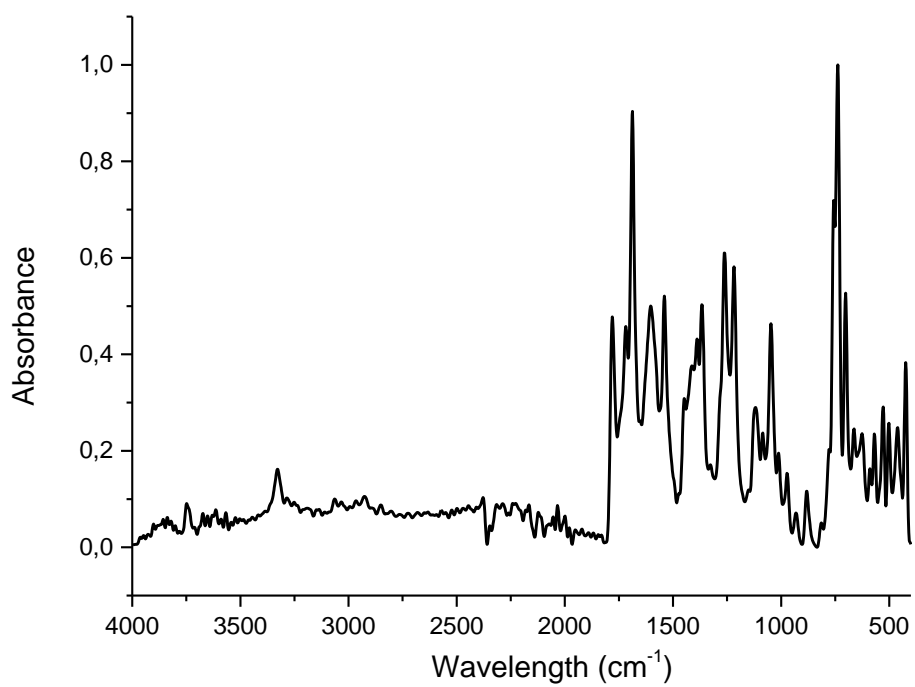

**Figure S17.** FT-IR spectrum of aerogel 6.



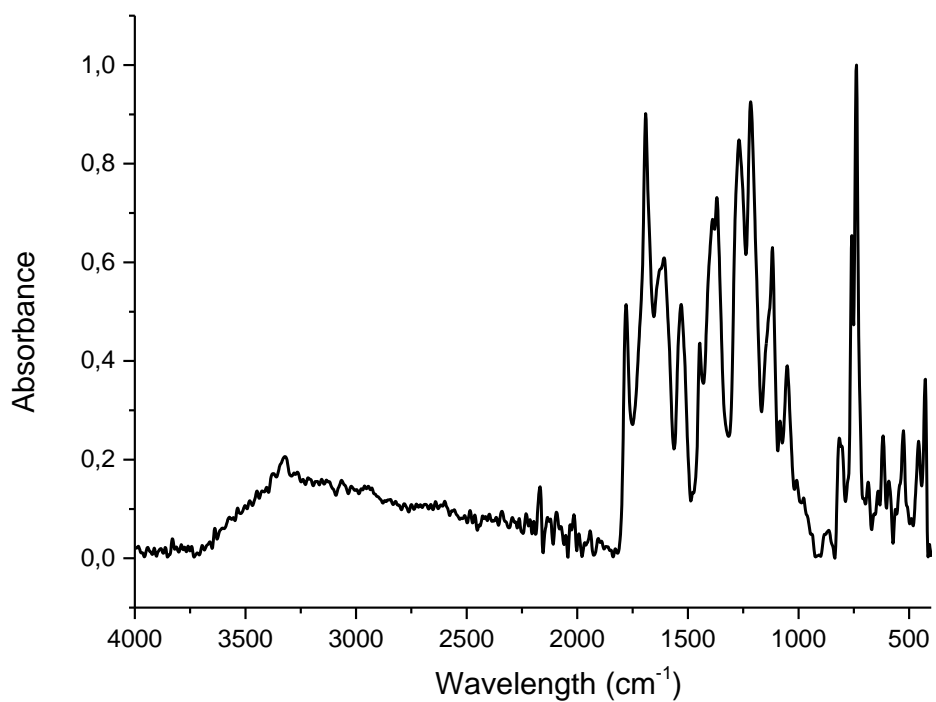

**Figure S18.** FT-IR spectrum of aerogel 7.

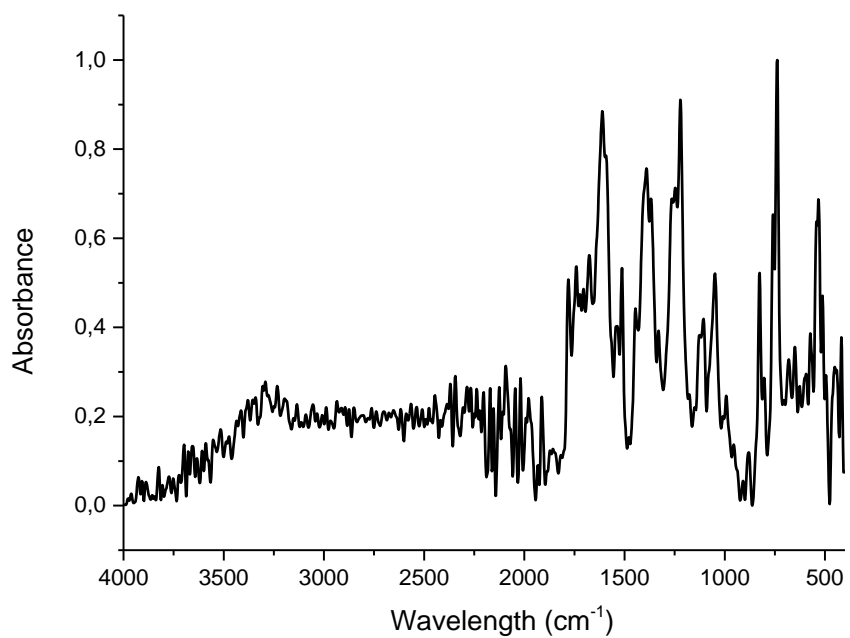

**Figure S19.** FT-IR spectrum of aerogel 8.

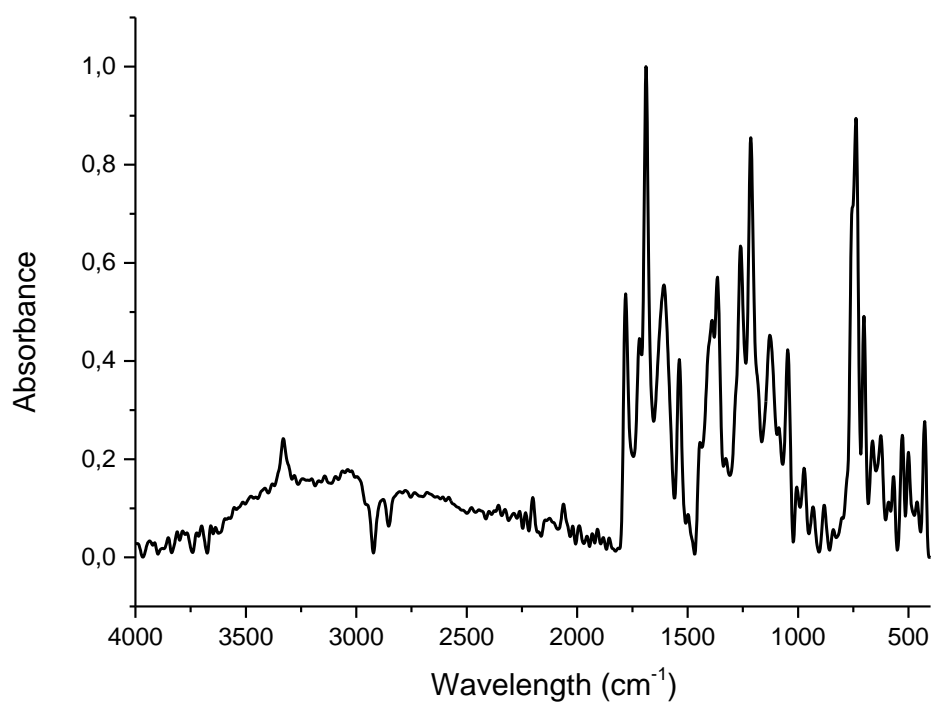

**Figure S20.** FT-IR spectrum of aerogel **9**.

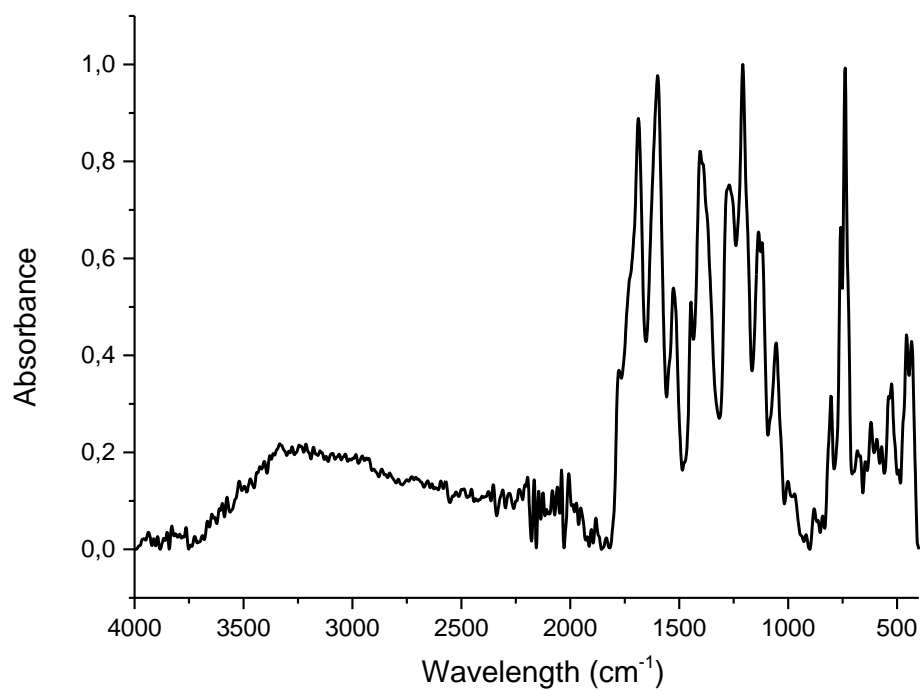

**Figure S21.** FT-IR spectrum of aerogel **10**.

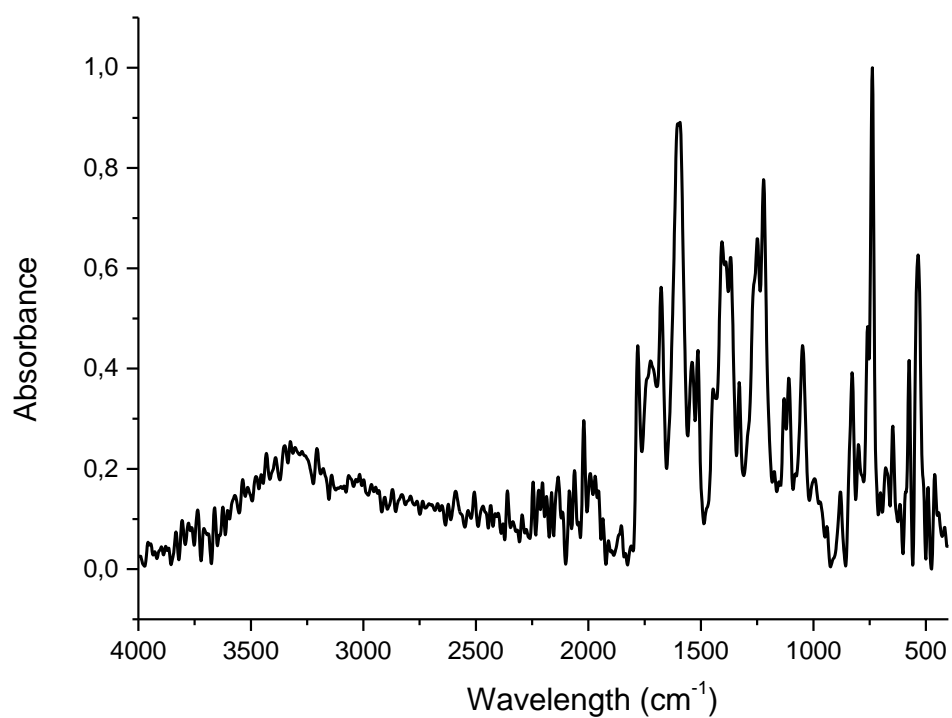

**Figure S22.** FT-IR spectrum of aerogel **11**.

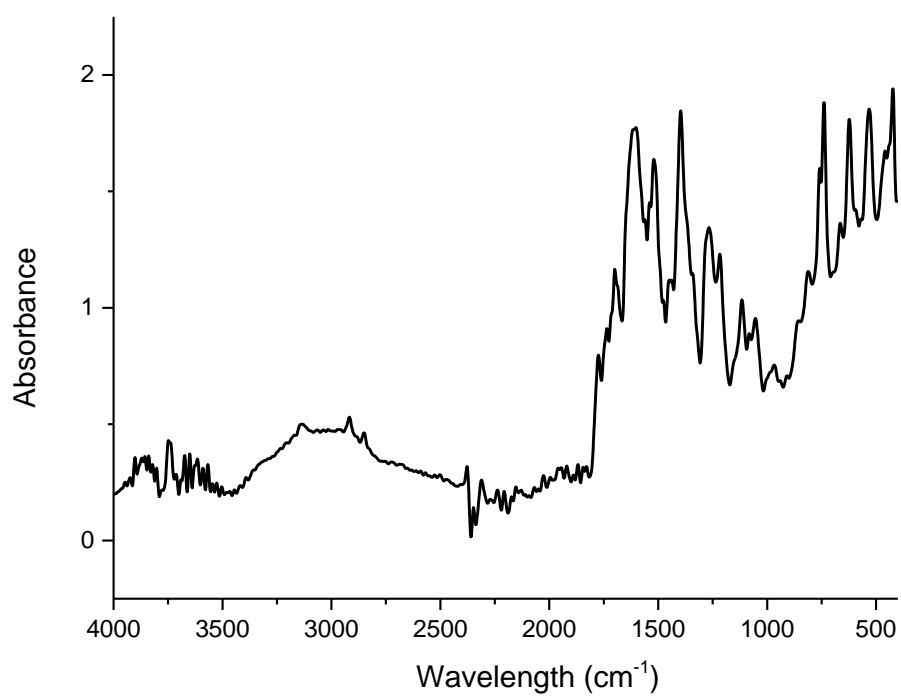

**Figure S23.** FT-IR spectrum of aerogel **13**.

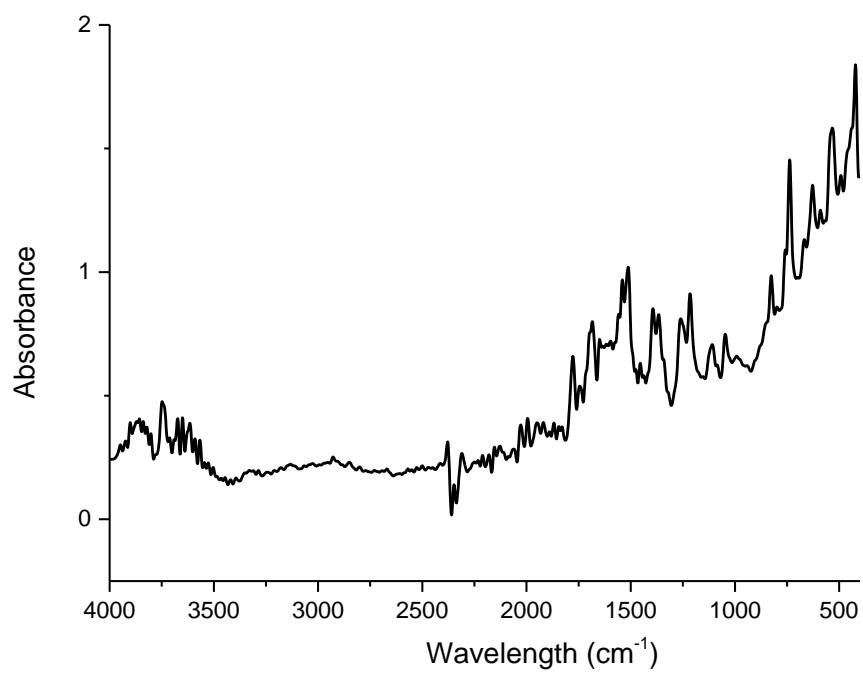

**Figure S24.** FT-IR spectrum of aerogel **14**.

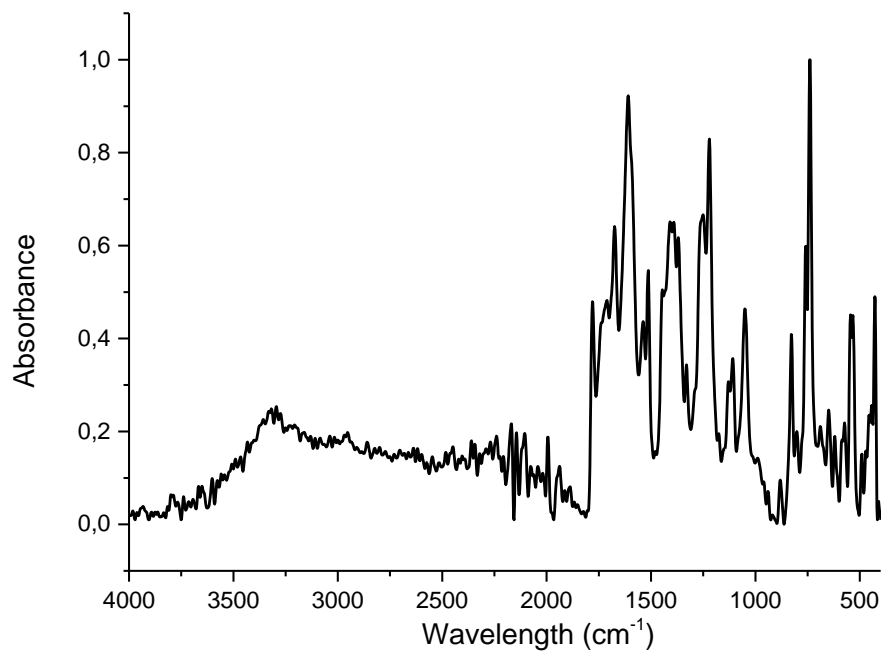

**Figure S25.** FT-IR spectrum of aerogel **17**.

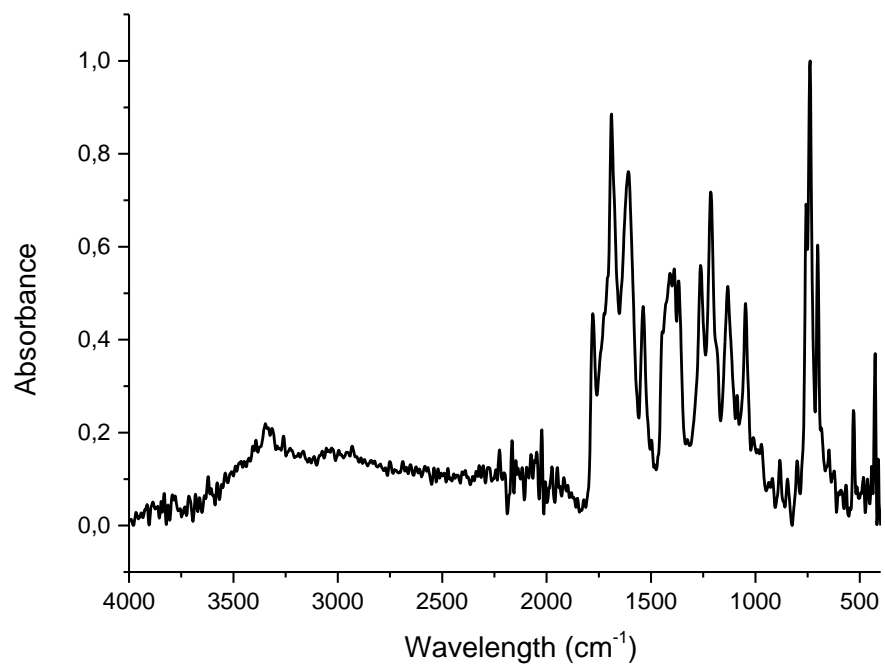

**Figure S26.** FT-IR spectrum of aerogel **18**.

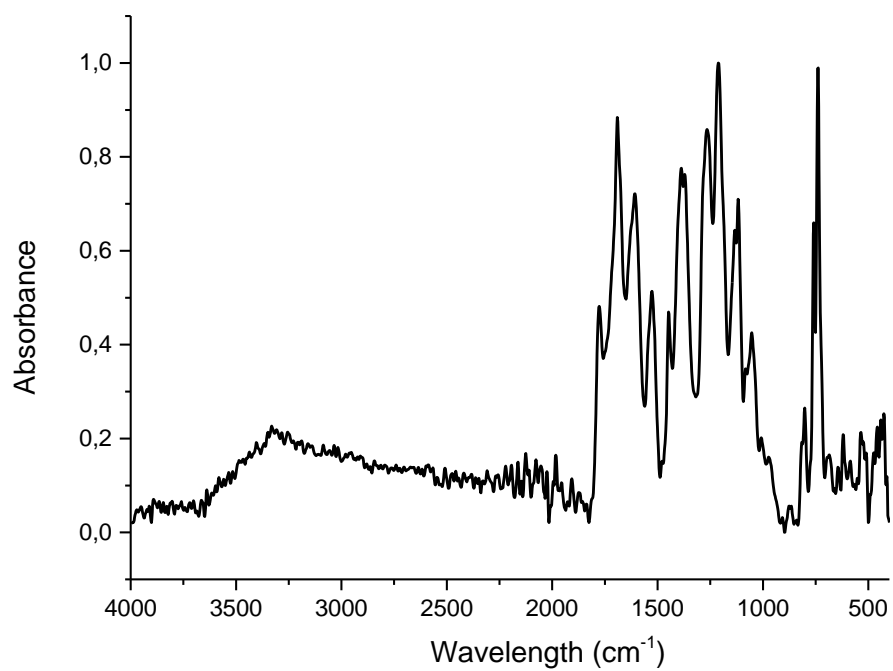

**Figure S27.** FT-IR spectrum of aerogel **19**.

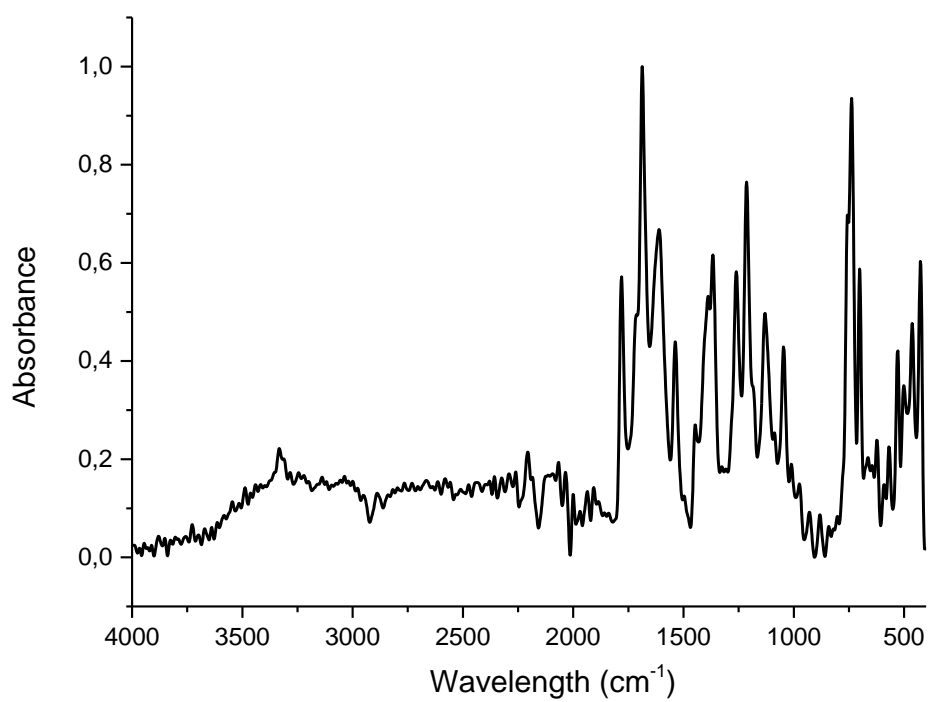

**Figure S28.** FT-IR spectrum of aerogel **21**.

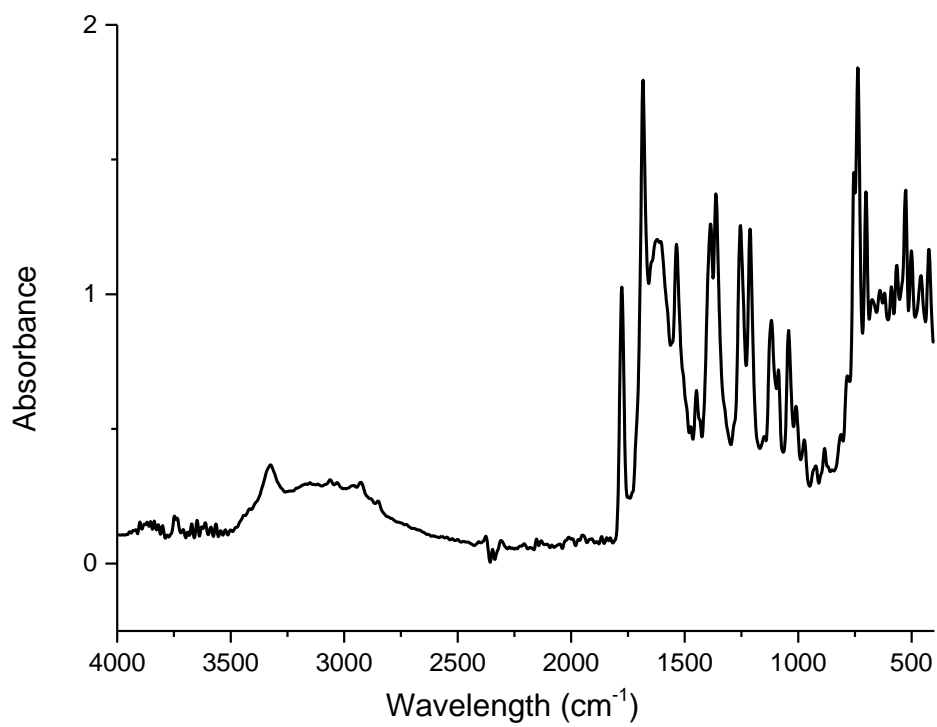

**Figure S29.** FT-IR spectrum of aerogel **30**.
